# Supplementary material
Source: MDPI journal article supplement (https://www.mdpi.com/2077-1312/11/6/1187)
Supplement: s1 [file s1]

NP\_524873- -----  
NP\_524802- MK-----  
NP\_572854- -----  
BT121711-F M-----  
BT121232-F M-----  
MK887318-F -----  
BT077723-F -----  
BT121164-F -----  
P02792-FTL -----  
P02794-FTH -----  
GKAA010092 -----  
GKAB010168 -----  
HAGX010164 -----  
GJIZ011008 -----  
GAXK011425 -----  
GAXK011686 -----  
GAXK011701 -----  
GAXK011690 M-----  
GBXT010251 -----  
GJFL010131 -----  
GJFL010098 -----  
GJFL010061 MF-----PWMT-----  
GJFL010035 M-----  
GJRL010689 M-----  
GJRL010253 -----  
GJQX012439 -----  
GJQY012322 -----  
GJQY010547 MF-----P-----  
GJQY010045 -----  
GJQY012928 -----  
GIVX010931 -----  
GIVX012281 -----  
GKAD010080 -----  
GKAD010013 -----  
GKAD010082 -----  
GJRE012107 -----  
GJRE010895 -----  
GFUA010006 -----  
GARW010443 -----  
GARW010112 -----  
GARW010174 -----  
GCIW010237 -----  
GFWO011986 -----  
GFUD010187 -----  
GFUD010193 -----  
GFUD010218 -----  
GFUD010230 M-----  
GFUD010333 -----  
GFUD010085 -----  
GJRU010328 -----  
GJRH010278 -----  
GCJT010110 MR-----  
GHXK010671 -----  
GHXK012857 -----  
GHXK011403 -----  
GHXK011411 -----  
GFCI010964 -----  
GHWV011161 M-----  
GHWV011130 -----  
TRINITY\_DN -----  
TRINITY\_DN -----  
TRINITY\_DN -----  
GKAP010174 MARPTPTTPTAPTISPTNPMARPTPTNPTRPLTINTSIPLISVIILDTTTKAELKKST  
GINW011006 M-----  
GINW012482 M-----  
GINW010990 -----  
GINW012479 -----  
GINW012344 -----  
GJGX010431 -----  
GJGX011542 -----  
GJGX011121 -----  
GJGX011464 -----  
GCIT010248 -----  
HAHV011241 -----

NP\_524873- -----MVKLIASLLLLAVVAQAYGDFKC-SLAVP---EITKDWVDMKDAC---  
 NP\_524802- -----FFVALALFACLGSLALAKDDEYQC-NTVIT--ACSTSAFSANSICNAR  
 NP\_572854- -----MAWCFR-D--IR-RHMCMLVRQNFASKC---  
 BT121711-F -----ITVMKVLAIFAILITGAHGSCNIGSQTDPKGKATPEDPTNYHEFC---  
 BT121232-F -----IKQLLLLSILVASCVGGPDSCGA-HTDVQ--CGNPGTKWESGICNSV  
 MK887318-F -----MAQQIRQNYDPEC---  
 BT077723-F -----MSSQIRQNYDSEC---  
 BT121164-F -----MSSQIRQNYDSEC---  
 P02792-FTL -----MSSQIRQNYSTDV---  
 P02794-FTH -----MT-TASTSQVRQNYHQDS---  
 GKAA010092 -----MGKLMNIVLIAGLAGLVKASCDT-DTINP--VSAQDTPNYRENC---  
 GKAB010168 -----MNKLLNIVVMAGMVGLARAACDV-EA INP--VSAREATNYRDNC---  
 HAGX010164 -----  
 GJIZ011008 -----MTSTIRQNYHEEC---  
 GAXK011425 -----MNSTIRQNYHEDC---  
 GAXK011686 -----MAMSKVKQNFHSDS---  
 GAXK011701 -----MASKIRQNYHEEC---  
 GAXK011690 -----KLFVALVSLSVLVVAEDGACYT-HVNDK--CEAPGDDWVSGSCNSV  
 GBXT010251 -----MTSQIRQNYHEEC---  
 GJFL010131 -----  
 GJFL010098 -----  
 GJFL010061 -----KITSLVARKLITVGLR-----NTSQT-IMSPATIRQNFHGEC---  
 GJFL010035 -----KLFVALASLSVALVVAEDGACYK-HVNDK--CEAPGDDWVSGSCNSV  
 GJRL010689 -----FHSKMLSLLMALVVSLSASTCST-NTSDE--KEEAKDTANYQPAC---  
 GJRL010253 -----MASKIRQNYHEEC---  
 GJQX012439 -----MTSQIRQNYHEDC---  
 GJQY012322 -----MSPANIRQNFHDEC---  
 GJQY010547 -----KMLTLAARKLITAGLR-----NTSQT-NMSPANIRQNFHDEC---  
 GJQY010045 -----  
 GJQY012928 -----MASKIRQNYHEEC---  
 GIVX010931 -----MALSRCRQNFHEES---  
 GIVX012281 -----MASKIRQNYHEEC---  
 GKAD010080 -----MLVFAVLLSLLGAVAPSC TT-ENADP--ALARDAANYREHC---  
 GKAD010013 -----  
 GKAD010082 -----MATIRQNYLEAS---  
 GJRE012107 -----MTSQVRQNYHEEC---  
 GJRE010895 -----MTSKIRQNYHEEC---  
 GFUA010006 -----MMLLSVVGVSLLGAAAATCVS-ERTNP--VRAHDPANYRESC---  
 GARW010443 -----  
 GARW010112 -----MAISIVRQNYHAES---  
 GARW010174 -----MAISVIRQNYHSEA---  
 GCIW010237 -----MLPIVLLGLTAAPLARASCSV-SNP NP--AEANDPENYKVCAC---  
 GFWO011986 -----MMLYVLLISMALVDMSTAKCDT-SSADP--ASAQDSANYRETC---  
 GFUD010187 -----MASKIRQNYHEES---  
 GFUD010193 -----MAMSKVKQNFHSDS---  
 GFUD010218 -----MNMIRQNYHEEC---  
 GFUD010230 -----FQSNMLALLMTVMVGLASSTCSV-SSPDE--KAKASDPANYQQT C---  
 GFUD010333 -----MSPASIRQNFHEDC---  
 GFUD010085 -----MTSQIRQNYHEEC---  
 GJRU010328 -----MSSKIRQNYHEEC---  
 GJRH010278 -----MSSKIRQNYHEEC---  
 GCJT010110 -----YLATTVSIVLLLSKFRGAVASCSIGEESDPLGKAKSSDGYNHEDC---  
 GHXK010671 -----MSPKFLLLALVGLSNASCSVGPHSDPEGPAKASDPENYHEVC---  
 GHXK012857 -----MSQSKVRQNFHSNS---  
 GHXK011403 -----MSSLARQKFSTAC---  
 GHXK011411 -----MSLARQNFAKAS---  
 GFCI010964 -----MASNIRQNYHEEC---  
 GHVW011161 -----KVTTLI FAGLLMFGVSSVHGSCSV-SNPDP--ALAKDPANYKEEC---  
 GHVW011130 -----MASRIRQNYHEDC---  
 TRINITY\_DN -----MIFTMFLVMTTSTIPLISASCSV-TSTQP--TAKANDSANYQDSC---  
 TRINITY\_DN -----MAMSKVKQNFHSDN---  
 TRINITY\_DN -----MSVSKIRQNYHQDS---  
 GKAP010174 SSSNSEQFTQIKSKMLVFAAVVLSVMGAVAPT CNS-NPDNP--VSAQDPANYRETC---  
 GINW011006 -----RMLLLTLFIGGALACQNRLTLV-QEAVG--HAEDLSTDVHDACNGE  
 GINW012482 -----RAFWCFLVFAGSAVAEEESCTM-HAERT--CLEPGSNWKQGPCNSV  
 GINW010990 -----MAATQPRQNYHAEC---  
 GINW012479 -----MASQIRMNYQDDC---  
 GINW012344 -----MASQIRMNYHEDC---  
 GJGX010431 -----MPSLIVLFGALGAAAASCST-SNSNP--ALARDAANYRENC---  
 GJGX011542 -----MAVSKVKQNFHTES---  
 GJGX011121 -----  
 GJGX011464 -----  
 GCIT010248 -----MASTSPIRQNFHEEC---  
 HAHV011241 -----MSSSPIRQNFHEEC---

NP\_524873- -----IKGMRNQIQE**E**INASY**Q**YLAMGAYFSRDTVNRPGFAEHFFKAAK**EERE**HGSK  
 NP\_524802- FA-GIDHIEPIQSYINANLAKSYD**Y**LLLATHFNSYQKNRPGFQKLYQGLSD**RSFE**D**S**IA  
 NP\_572854- -----EKKLNDQIN**M**E**L**KASH**Q**YLAMAYHFDRSDISSPGMHRFFLKASV**EERE**HAEK  
 BT121711-F -----ISSLRNQVK**M**E**F**EAA**LQ**YLVMGAYFDQDTINLKGFQKFFWESAD**EER**HGLQ  
 BT121232-F FG-GFKGNTRNLSVLINRHLNDSFK**Y**LVMASYFDSAENVNRMGFNKYIQGYSD**KLWD**NGKD  
 MK887318-F -----EDLINKQIN**M**E**L**YAFY**S**YLSMGAYFSRDDVALDGFQKFFYISAS**EETR**HAQK  
 BT077723-F -----EALINKQIN**M**E**L**FASY**T**YLSMGAYFSRDDVALEGFQKFFYESS**S**E**ENT**HARN  
 P02792-FTL -----EAAVNSLVNL**X**LQASY**T**YLSLGFYFDRDDVALEGVSHFFRELAE**E**K**RE**G**Y**ER  
 P02794-FTH -----EAAINRQIN**L**E**L**YASY**V**YLSMSYFDRDDVALKNFAKYFLHQSH**EERE**HAEK  
 GKAA010092 -----IDVLAKQVR**M**E**F**EAS**LQ**YLLMAAQFSQDTYHLPGLAGTFWKSAD**EERE**HGKA  
 GKAB010168 -----IDVLSKQVR**M**E**F**EAS**LQ**YLLLAQFSQDTYHLPGLAGQFWKSAD**EERD**HGKQ  
 HAGX010164 -----MAAHFDRDDVALHGFRDFFKKS**A**E**E**E**S**HAQM  
 GJIZ011008 -----EALINKQIN**M**E**F**YASY**V**YLSMSSYFNRYDQALHGFQKFFAKSS**N**E**EERE**HGMK  
 GAXK011425 -----EGLINKQIN**T**E**F**YASY**V**YLSMSSYFNRSQALHGFQKFFMERSE**N**E**RT**RGVN  
 GAXK011686 -----EALINKQIN**M**E**L**YASY**V**YLSMSSYFARDIDIALGFSKRFEAS**H**E**E**K**E**HAEL  
 GAXK011701 -----EALINKQIN**M**E**F**YASY**V**YLSMASYFNRRDQALNGFASFFQKNS**N**E**EERE**HGMK  
 GAXK011690 HG-GFKGNSDNLHRIIVD**D**FTDSMN**Y**LLMASSFSSTDKVNRMGFSKFFMEKSD**TMWG**RGKD  
 GBXT010251 -----EALINKQIN**M**E**F**YASY**V**YLSMSSFFNRDDQALHGFQKFFQKSS**N**E**EERE**HGMK  
 GJRL010131 -----MEMSASY**T**Y**L**ALYSYFIQHDKALHGFAKMF**L**KNS**H**E**EERE**HGGL  
 GJFL010098 -----MSSYFNRSQALHGFQKFFMERSE**N**E**RT**RGVN  
 GJFL010061 -----EKSLNKQIN**M**E**L**YASY**T**YLSLYSYFIQDQKALHGFAKMF**M**KNS**Q**E**EERE**HSLT  
 GJFL010035 HG-GFKGNSDNLHRIIVD**D**FTDSMN**Y**LLMASSFSSTDKVNRMGFSKFFMEKSD**TMWG**RGKD  
 GJRL010689 -----IAALEAQIRI**E**F**E**AS**LQ**YLLMAAHFDEDTVNLPKVAELFWSHAD**EERS**HAIQ  
 GJRL010253 -----EALINKQIN**M**E**F**YASY**V**YLSMASYFNRRDQALHGFQKFFQKASD**EERE**HGMK  
 GJQX012439 -----EALINKQIN**M**E**F**YASY**V**YLSMASYFNRRDQALNGFASFFQKNS**N**E**EERE**HGMK  
 GJQY012322 -----EKSLNKQIN**R**E**M**HASY**T**YLSLYSYFIQDQKALYGFQKMF**I**KKS**Q**E**EERE**SLT  
 GJQY010547 -----EKSLNKQIN**M**E**M**HASY**S**YLSLYSHFIQHDNALHGFAKMF**I**KNS**Q**E**E**W**E**SLT  
 GJQY010045 -----MEMCASY**T**Y**L**ALYSYFSQHDKALHGFAKMF**L**KNS**Q**E**EERE**HGGL  
 GJQY012928 -----EALINKQIN**M**E**F**YASY**V**YLSMASYFNRRDQALHGFQKFFQKASD**EERE**HGMK  
 GIVX010931 -----EAAINKQIN**M**E**L**YASY**A**Y**L**AMFTYFDRDDVASPGFAKFF**E**EAS**K**E**EERE**HAEK  
 GIVX012281 -----EALINKQIN**M**E**F**YASY**V**YLSMASYFNRRDQALPGFASFFQKNS**N**E**EERE**HGMK  
 GKAD010080 -----VNALAAQVR**M**E**F**EAS**LQ**YLLMAAQFSQDSYNLPGVAGLFWTHAD**EERD**HAKA  
 GKAD010013 -----MEFYASY**V**YLSMASYFNRRDQALSGFASFFQKNS**N**E**ERD**HGMK  
 GKAD010082 -----EAGVNKQIN**L**E**L**YASY**T**YLSMAFYFDNTTVALPGAHKY**F**KKASD**EERE**HAML  
 GJRE012107 -----EALINKQIN**M**E**F**YASY**V**YLSMSSFFNRDDQALHGFAKFF**E**KSS**N**E**EERE**HGMK  
 GJRE010895 -----EALINKQIN**M**E**F**YASY**V**YLSMASYFNRRDQALHGFAKY**F**QKASD**EERE**HGMK  
 GFUA010006 -----VAALSNQVR**M**E**F**EAS**LQ**YLLMAAHFTQDNYNLPGVAGLFWTHAD**EERD**HAKQ  
 GARW010443 -----MEFQAAM**Q**YLLMGAYFSQDININLDGYSKFFYGHAD**EER**HGVQ  
 GARW010112 -----EALLNKQIN**M**E**L**YASY**A**YLSMAAYFDRDDVALHGFAKFF**M**KSSD**EERE**HGMK  
 GARW010174 -----EAIINRQIN**M**E**L**YASY**V**YLSMASYFDRDDVALHGFAKFF**R**DN**S**A**EERE**HAME  
 GCIW010237 -----ISVLKDQVR**M**E**F**EAS**LQ**YLLMAAFTQDSYNLPGVATIYWTHAD**EERD**HGKA  
 GFWO011986 -----ISALSKQVR**M**E**F**EAS**LQ**YLLMAAQFSQDTYNLPGVAKLFWHDAD**EERE**HAKQ  
 GFUD010187 -----EALINKQIN**M**E**F**YASY**V**YLSMASYFNRRDQALHGFAKFFQKNS**N**E**EERE**HGMK  
 GFUD010193 -----EALINKQIN**M**E**L**YASY**V**YLSMASYFARDDIALGFAKRF**E**AS**K**E**E**K**E**HAEL  
 GFUD010218 -----EALINKQIN**M**E**F**YASY**V**YLSMSSYFNRS**D**LALHGFAKFF**M**ERSD**K**E**R**G**Q**GVK  
 GFUD010230 -----ITALEQQVR**I**E**F**EAS**LQ**YLLMGAFHDQDTVNLPKVAELFWSHAD**EERS**HAIQ  
 GFUD010333 -----EKSLNKQIN**M**E**M**YASY**T**YISLYSYFIQHDKALHGFAKFF**F**KSS**Q**E**EERE**HSM  
 GFUD010085 -----EALINKQIN**M**E**L**YASY**V**YLSMSSFFDRDDQALHGFAKFFQKNS**N**E**EERE**HGMK  
 GJRU010328 -----EALINKQIN**M**E**F**YASY**V**YLSMASYFNRRDQALHGFAKY**F**QKASD**EERE**HGMK  
 GJRH010278 -----EALVNKQIN**M**E**F**YASY**V**YLSMASYFNRRDQALHGFAKFFQKNS**N**E**EERE**HGMK  
 GCJT010110 -----TTSLSRQIK**M**E**F**EAS**LQ**YMLMGAFHQDTVNLLGGFSKMF**F**EHAN**EERE**HGIK  
 GHXX010671 -----IEALRSQVR**K**E**F**EAS**LQ**YLLMGAYFEQDDINLPGFAKMF**F**EHAD**EERE**HGIK  
 GHXX012857 -----EAFINKQIN**M**E**L**YASY**V**YMSMYTYFCRDDVALKGFAKFF**K**SS**E**E**EERE**HALK  
 GHXX011403 -----EALNAQVNA**E**LSASY**V**YRAMAAHFDRDDVALNGFRDFFKAA**E**E**E**TEHAQM  
 GHXX011411 -----EEALNDQIHA**E**LSASY**A**YRAMAAHFDRDDIALPGFHKFF**K**HSY**E**E**E**SEHAEM  
 GFCI010964 -----EALINKQIN**M**E**M**YASY**V**YLSMASYFSRDDQALDGFQKFF**R**KSSD**EERS**HAIM  
 GHVW011161 -----ISSLNQVR**M**E**F**EAS**LQ**YLLMGAFSSQDTYNLPGVANIFWTHAD**EERD**HGKA  
 GHVW011130 -----EALINKQIN**M**E**L**YASY**V**YLSMSSYFAREEVALHGFSKFF**R**KSSD**EERE**HATK  
 TRINITY\_DN -----ISALHDQVR**I**E**M**EAS**LQ**YLLMAAHFTEDTINLPNIAE**I**FWSHAD**EERS**HAIS  
 TRINITY\_DN -----EALINKQIN**M**E**L**YASY**V**YLSMASYFARDDIALQGFQKRF**L**DSS**Q**E**ERD**HAQK  
 TRINITY\_DN -----EALVNKQIN**M**E**F**YASY**V**YLSMASYFNRRDQALHGFAKFF**R**KQSD**EERD**HGIK  
 GKAP010174 -----ISALSQQVR**M**E**F**EAS**LQ**YLLMAARFSQDTYHLPGVANLFWTHAD**EERE**HAKA  
 GINW011006 VGTFLSAHADPYKLLNK**L**SLAMKY**M**AISSHFGSDRNHRLGFKK**L**FRDASD**E**R**F**E**Q**AVD  
 GINW012482 YG-GFRGNEDNLQDLMRS**H**LDDSF**K**YLVMAASKFNTDQVNR**L**GMHGL**L**QGHSD**M**EWAKGKD  
 GINW010990 -----EAGVNKQIN**L**E**L**YASY**V**YMSMSYFDRDDIALKGFAKY**F**KD**N**SD**EERE**HAEK  
 GINW012479 -----EALINKQIN**Q**E**L**YASY**V**YLSMSYFDRDDVALPGMK**K**FMKEASD**EERE**HAEN  
 GINW012344 -----EASINKQIN**M**E**L**YASY**V**YMSMSYFDRDDIALPGMK**K**FFKESD**EER**GHAEI  
 GJGX010431 -----VNALAAQVR**M**E**F**EAS**LQ**YLLMAAQFSQDSYNLPGVAGLFWTHAD**EERD**HAKA  
 GJGX011542 -----ESLINKQIN**M**E**L**YASY**T**YLSMAAYFARDDIALHGFAKRF**E**AS**H**E**EERE**HAEK  
 GJGX011121 -----MEFYASY**V**YLSMSSWFARSEVALPGFAAH**F**RTES**N**S**EERE**HGMK  
 GJGX011464 -----MEFEES**LQ**YLLMAARFSQATYHLPGVANLFWNHAD**EER**AHAKA  
 GCIT010248 -----EALINKQIN**M**E**M**YASY**V**YLSMGYFDRDDALPGFSA**F**FRKSS**T**E**EERE**HGML  
 HAHV011241 -----EALINKQIN**M**E**M**YASY**V**YLSMGYFDRDDALPGFSA**F**FRKSS**S**E**EERE**HGML

NP\_524873- LVEYLSMRGQLTEGVSD-----LINVPT----VAKQEW-TDGAAALSDALDLEIKVTKSI  
NP\_524802- LMKQVTRRGIV--DFN-----TRHESSGSVSTKRGTELEVDELHSLALALDTEKQLATGA  
NP\_572854- LINTYMNKRGLI--ILS-----SVQPL-----PCFA-STLDALKHAMKMLEVFNKHL  
BT121711-F FIKYLRHRGDKGLDFFQ----GDIEPI----LRKYSWS-DGLDALRDALMMEKKVSGSI  
BT121232-F ILKYVLSRGGSDADPNLKV---TAMQMPN-----YQ-GEVLSMSASLDMMKQLMEDM  
MK887318-F LIDYQHLRGGKV--VFE-----SVQTPS-----VQSWD-SPVDAMEAALNLEKVNNASL  
BT077723-F LINYQTLRGGRV--VFQ-----DISRPN-----VETWA-SPVEAMEAALQLEKDVNASL  
BT121164-F LINYQTLRGGRV--VFQ-----DISRPN-----VETWA-SPVEAMEAALQLEKDVNASL  
P02792-FTL LLKMQNQRGGRA--LFQ-----DIKPPA-----EDEWG-KTPDAMKAAMALEKKLNQAL  
P02794-FTH LMKLQNQRGGRI--FLQ-----DIKKPD-----CDDWE-SGLNAMECALHLEKVNQSL  
GKAA010092 FIDYLRMRGYTGNSFFE----AGPLKPI----LNKNTWE-SASEALRDALDMEKAVTASM  
GKAB010168 FIEYLRMRGYQGNSFFE----DGTIKPI----LNKNSWE-SASEALRDALDMEKAVTASM  
HAGX010164 FIDYLNKRGGRV--VFK-----PIVAPK-----NEWT-TALEALEDALVLEKDVNEKL  
GJIZ011008 LMEYQTKRGGKV--VFQ-----DIKAPS-----SSEWG-TPLEAMEAAIELEKTVNQSL  
GAXK011425 LIDYQAKRGGKV--VLL-----EIAKPN-----RLEWG-TAMDAMVAALDLEKTVNKNL  
GAXK011686 LIDYQNMRRGGRV--VFR-----EIAKPT-----CDEWG-TALEAIEASLELEKTVNESL  
GAXK011701 LMEYQTKRGGKV--VFQ-----DIKAPS-----STEWG-TPIQAMEAALELEKTVNQSL  
GAXK011690 MIKYVLKRGKGKMGTFQI---PPFGESNQR--VGDYDYS-NEMKGLGVTLDDLKSRASDV  
GBXT010251 LMEYQTKRGGKV--VFQ-----DIKAPS-----STEWG-TPIQAMEAALELEKTVNQSL  
GJFL010131 LVEYVTKRGGKV--VLE-----DLKKPE-----MELS-TAKNAVEAALNLEKDVNQSL  
GJFL010098 LMEYQAKRGGKV--VLL-----EIAKPN-----RLEWG-TAMDAMIAALDLEKTVNKNL  
GJFL010061 LIDYQAKRGGKV--VME-----DIKKPE-----VELK-TAKDAVEAALQLEKEVNQSL  
GJFL010035 MIKYVLKRGKGKMGTFQI---PPFGETNQR--VGDYDYS-NEMKGLGVTLDDLKARASDV  
GJRL010689 FIKYLRMRGAEENDDFFG----GASIQPR-----EKVFAWA-GVEEALKMALKMEKDV TAKM  
GJRL010253 LMTYQAKRGGRV--VFQ-----DIKAPS-----SMEWG-TPLEAMEAALELEKTVNQSL  
GJQX012439 LMTYQAKRGGRV--VFQ-----DIKAPS-----SMEWG-TPLEAMEAALELEKTVNQSL  
GJQY012322 LIDYQTKRGGKV--IME-----DIKKPE-----IELM-TAKDAVEAALQLEKEVNQSL  
GJQY010547 LIDYLTKRGGKV--VME-----DIKKPE-----VELK-TAKDAVEAALQLEKEVNQSL  
GJQY010045 LIEYVTKRGGKV--VME-----NIKKPE-----IELS-TAKNAVEAALNLEKDVNQSL  
GJQY012928 LMTYQAKRGGRV--VFQ-----DIKAPS-----SMEWG-TPLEAMEAALDLEKTVNQSL  
GIVX010931 LIKYLNRKGGRV--IYH-----PIEKPM-----KQEWG-SCLEAMEDALSM EKDVNESL  
GIVX012281 LMEYQAKRGGRC--VFQ-----DIKAPS-----SMEWG-TPLEAMEAALELEKTVNQSL  
GKAD010080 FIGYLRMRGYEETDFFG----GQPIKPI----LEKNTWS-TVSEALRDGLMMEKKVTGSM  
GKAD010013 LMTYQAKRGGRV--VFQ-----DIKAPS-----SMEWG-TPLEAMEAALELEKTVNQSL  
GKAD010082 LMKFQNQRGGTI--VLQ-----DVKKPE-----NDSWG-SLKDAVQAALALEKHVNQSL  
GJRE012107 LMEYQTKRGGKV--VFQ-----DIKAPS-----STEWG-TPLQAMEAALELEKTVNQSL  
GJRE010895 LMSYQAKRGGRV--VFQ-----DIKAPS-----SMEWG-TPLEAMEAALELEKTVNQSL  
GFUA010006 FIEYLRMRGSHENDFFG----SDPIKPI----LGKNTWT-SVSEALRDALKMEKAVSASM  
GARW010443 FIDYLRHRGDNDDLFPP-----DIVPI----LGKTFWI-DGEAALRDALFMEKEVSKSI  
GARW010112 FVKYQNMRRGGRV--VFQ-----DILKPN-----TAEWG-SALEAVQAALDLEKVNNTSL  
GARW010174 FMKYQNMRRGGRV--VFQ-----DITKPN-----NDEWG-SALEAIQAAFDLEKKVNLSL  
GCIW010237 FIEYLRMRGYEDNDFFG----GEPLRPR----LSKSNWT-SVSESIRDALAMEKAVSGSM  
GFWO011986 FIGYLRRLRGSLENDFFG----GNPIKPI----LGKNQWG-SVAEALRDALGMEKAVSGSM  
GFUD010187 LMEYQAKRGGKV--VFQ-----DIKAPS-----SMEWG-TPVDAMEAALELEKTVNQSL  
GFUD010193 LIDYQNMRRGGRV--VFR-----EIAKPT-----CDEWG-TALEAIEASLELEKTVNESL  
GFUD010218 LMGYQANRGGKV--VLL-----EIAKPS-----RLEWG-TAMDAMTAALELEKTVNQNL  
GFUD010230 FIQYLRMRGAVNNDFFG----GNPIQPK----EKVYTWAGIEEALQLALKMEKDVSGKM  
GFUD010333 LIDYQAKRGGKV--VME-----DIKKPE-----IEFS-TAKDAVEAALKLEKEVNQSL  
GFUD010085 LMEYQTKRGGKV--VFQ-----DIKAPS-----STEWG-TPLQAMEAALELEKTVNQSL  
GJRU010328 LMNYQAKRGGRV--VFQ-----DIARPS-----SMEWG-TPLDAMEAALELEKTVNQSL  
GJRH010278 LMNYQAKRGGRV--VFQ-----DIKAPS-----SMEWG-TPVDAMEAALELEKTVNQSL  
GCJT010110 FIEYLRMRGDATDLDGI----DELTPI----LYKSTWE-DGEEALRDALKMEKAVTRSI  
GHXX010671 FMDYIRMRGDDLTNFIPS---SASLTPI----LGKTSWV-DGEDALRDALTM EKLV T GSI  
GHXX012857 LIDYQNMRRGGRV--VFQ-----NVDKPN-----KSEWG-SPLEAVEAALELEKTVNQSL  
GHXX011403 FIDYINKRGGRV--VLK-----AIGAPK-----CEWS-TALEALEDAMTLEKDVNEKL  
GHXX011411 FTEYQNKRRGGRV--VLK-----PIAAPK-----QEWS-SALEAVEDALALEKDVNEKL  
GFCI010964 FMDYQNKRRGGKC--VFQ-----DIKAPT-----PAEWG-SPLEAVMAALELEKKVNQTL  
GHWV011161 FISYLRMRGAQDQDFFA----GQPIKPI----LQKFSWD-SATEALRDALSM EKTVSGSM  
GHWV011130 FMEFQNRRGGKV--VFQ-----DIKAPT-----TTEWG-SPLQAVEAALELEKTVNQSL  
TRINITY\_DN FINYLMRGATDNDFFH----GQPIQPK----ERAYDWPEGASEALEMALKMEKDVSGRM  
TRINITY\_DN LIEYQIRRGGRV--VFR-----EITKPS-----VDEWG-SALEATEASLELEKTVNESL  
TRINITY\_DN LMSYQAKRGGAV--VFQ-----DIKAPS-----SMEWG-TPIDAMEAALELEKTVNQSL  
GKAP010174 FISYLRMRGSQENDFFE----GNPIKPI----LGKNTWD-SVAEALRDALNM EKAVSKSM  
GINW011006 MIKYIVKRGGNIKQTLDVQVPLAVTKP-----QALPSLGMALADAKEIYAKQ  
GINW012482 LLGYVLKRGGKLGKQPLEV---NEFDVSR-----VE-GEVDALASSLDMYKRHAETA  
GINW010990 LMKFQNQRGGRI--VLQ-----AVQKPE-----KDEWG-SGLEAMQAALALEKVNQSL  
GINW012479 LMTYQNKRRGGRI--VLQ-----AIAVPS-----HQEWG-KALDALQAALDLEKTVNQSL  
GINW012344 LMEYQNKRRGGRI--VLQ-----AIAAPS-----LQEWG-SAHDALQAALDLEKTVNQSL  
GJGX010431 FISYLRMRGYQETDFFQ----GQPIKPI----LQKNSWD-SVSEALRDGLSM EKAVTGSM  
GJGX011542 LIDYQNRKGGRV--VFK-----EIAKPS-----VDEWG-TAIEAIEASMELEKTVNASL  
GJGX011121 LMEYQAKRGGKV--VFQ-----NIEKPT-----SMEWG-TPLQAMEAALELEKSVNQSL  
GJGX011464 VINYLMRGSRDNNFFQ----GNPIKPI----RGKNTWD-SVAEALRDALTM EKAVSKSM  
GCIT010248 FMEYQNKRRGGRI--VLQ-----DIKAPT-----RNEWG-SALEAMQTALELEKTVNQSL  
HAHV011241 FMEYQNKRRGGRI--VLQ-----DIKAPT-----RNEWG-SALEAVQTALELEKTVNQSL

NP\_524873- RKLIQTCENK-----PYNHYHLVDYLTGVYLEEQVHLGQRELAGKLTTLKKMMD-  
 NP\_524802- THVHSRATHA-----TDAERDPELAHYFEENFLGKAESVRKLSGYANDFAKLMKV  
 NP\_572854- LDLHALAG-----KEADPNLCDFIEANFLQEQVDGQKILADYISQLEKAQ--  
 BT121711-F KKIIDICSVE-----GKQDYLSGDWLTGTWLEEQMDGQRKLAGLINTLSNFRI-  
 BT121232-F RLVYKHAANK--HVSNTQPERESYDPPLLHYLEESFFEDYTERIRDLAGKLNILGKIARN  
 MK887318-F LHIHSVAA-----EKDDAQLCDFLESEYLKEQVEGIKISIGTLLTRMKRVG--  
 BT077723-F LNVHGSAS-----KKEDPQLCDFLES DYLKEQVDGIKKIGTLLTRMKRVG--  
 BT121164-F LNVHGSAS-----KKEDPQLCDFLES DYLQEQVDGIKKIGILLTRMKRVG--  
 P02792-FTL LDLHALGS-----ARTDPHLCDFLETHFLDEYVKLIKKMGDHLTNLHRLGG-  
 P02794-FTL LELHKLAT-----DKNDPHLCDFIETHYLNQVKAIKELGDHVTNLRKMG-  
 GKAA010092 KNMIDVCTQV-----GMDDPHAADWLTSTWLEEQLAGQRQLAGLINSLERFNR-  
 GKAB010168 KNMIDVCSKD-----GEDDPHAADWLTGTWLEEQLNGQRHLAGLINSLERFNR-  
 HAGX010164 LRMHSVAD-----AQNDPQMTDFIEGNFLNEQVDAIKDLADKITNLKRVG--  
 GJIZ011008 LDLHKASD-----GKGAHLCDYLEAEFLGEQVDGIKEIGDMITKIKRAG--  
 GAXK011425 LDLQKTCE-----QKEDAHLGDYIPSEFLDEQVEGIKAIGDMITQTKRVG--  
 GAXK011686 LNMHKMAD-----SHNDAQLTDFIEGTYLKEQVEAIKEIGDLVTMRRAG--  
 GAXK011701 LDLHKASD-----GKGAHLCDYLEAEFLGEQVEGIKEIGDMITKIKRAG--  
 GAXK011690 ITAYKXSLSSSKV----DDPSFPDPATAHMLEE-LSEDYTGEINEVAKKLNILGKMVRK  
 GBXT010251 LDLHKASD-----GKGAHLCDYLEAEFLGEQVEGIKEIGDMITKIKRAG--  
 GJFL010131 LNLHILAG-----EKGDCHLSNFLEEHLFLEEQVDAIKEIGDILLTRLEMAG--  
 GJFL010098 LDLQKICE-----QKEDAHLGDYIPSEFLDEQVKGIKTIGDMITQMKRVG--  
 GJFL010061 LDLHVLAG-----EKGDVHLSDFLEEHLFLEEQVDSIKEMGDLVTRLEMAG--  
 GJFL010035 ITAYKXSLSSSKT-----PSPFDPATAHMLEE-LSEDYTGEINEVAKKMNILGKMVRK  
 GJRL010689 KEMIDICSTS-----GHDDPHAADWLTGTWLEEQLHGQRHLAGLINTFNNFKR-  
 GJRL010253 LDLHKAAG-----GQGAHLCDYLEAEYLTEQVEGIKEIGDMITKIKRAG--  
 GJQX012439 LDLHKASD-----SKGDAHLCDYLEAEYLGEQVEGIKEIGDMITKIKRAG--  
 GJQY012322 FDLHVLAG-----DKGDADLSNFLEEHLFLEEQVDSIKKIGDLVTRLEMAG--  
 GJQY010547 LDLHVLAG-----NKGDAHLSDFLEEHLFLEEQVDAIKRIGDLVTRLEIAG--  
 GJQY010045 LNLQVLAG-----EKGDGHLSNFLEEHLFLEEQVDSIKEFGDLITRLKMAG--  
 GJQY012928 LDLHKASD-----SKGDAHLCDYLEAEYLGEQVEGIKEMGDMITKIKRAG--  
 GIVX010931 LKLHKVAS-----TREDPHLT KYLEDEFLEQVESIYKIAHHVTRLRRVG--  
 GIVX012281 LDLHKASD-----SNGDAHLCDYLEAEYLTEQVEGIKQIGDMITKIRRAG--  
 GKAD010080 KNMIDLCSQG-----GEDDPHAADWLTGTWLEEQLNGQRHLAGLINTLETFSL-  
 GKAD010013 LDLHKASD-----SNGDAHLCDFLEEEYLGEQVEGIKEMGDMITKIKRAG--  
 GKAD010082 LDLHKLAD-----SQGDAQMCDWIESHFLTEQVEAIKELGDHITQLTRVG--  
 GJRE012107 LDLHKASD-----GKGAHLCDYLEAEFLGEQVDGIKEIGDMITKIKRAG--  
 GJRE010895 LDLHKASE-----GKGAHLCDYLEAEYLAEQVEGIKEIGDMITKIKRAG--  
 GFUA010006 KNMIDLCSQG-----GEDDPHAADWLTGTWLEEQLNGQRHLAGLINS LD AFAR-  
 GARW010443 KKLIDVCDND-----DNDDYHAADWLT SQWLEEQLAGQRKLAGMINNLT FKR-  
 GARW010112 LEVHSTAS-----GHNDAQLTDFLEGEFLKEQVESIKEL-----  
 GARW010174 LEVHATAS-----KHDDAQLTDFLEGFTLKEQVEAIKHLGDLITKMKRAG--  
 GCIW010237 KRMIDICSQG-----GEDDPHAADWLTGTWLEEQLTGQRHLAGLINTLENFSR-  
 GFWO011986 KQ MIDLCSQG-----GEDDPHAADWLTGTWLEEQLNGQRHLAGLINTLESFSR-  
 GFUD010187 LDIHKVSG-----TKGDAHLCDFLETEYLTEQVEGIKEIGDMITKIKRAG--  
 GFUD010193 LNMHKMAA-----GHADAQFTDFIEGTFLKEQVEAIKEIADISTKMKRAG--  
 GFUD010218 LDLQKTCE-----LKEDAHLSDYIPGEFLDEQVEGIKMIGDLITKMKRTG--  
 GFUD010230 KEMIDICSTA-----QDDPHAADWLTGTWLEEQLHGQRHLAGLINTFNNFKR-  
 GFUD010333 LDLHVIAG-----EKGDGHLADFLEEHLFKEQVESIKEIGDLVTKLEMAG--  
 GFUD010085 LDLHKASD-----GKGAHLCDYLEAEYLGEQVDGIKEIGDMITKIKRAG--  
 GJRU010328 LDIHKISS-----SKGDAHLCDFLETEYLTEQVEGIKEIGDMITKIKRAG--  
 GJRH010278 LDVHKVSD-----NKGDAQLCDFLESEYLNQVEGIKEIGDMITKIKRAG--  
 GCJT010110 KDIIDVCE-----PKGDFYSADWLTGNWLEEQLQGQRKLAGMINS LHTFRQ-  
 GHXK010671 KKLIDVCDND-----QTKDYHAADWLTGKWLEEQLDGQRKLAGMINS LNSFRI-  
 GHXK012857 LDMHKTAD-----GSADPQLCDFIESNYLEEQVESIKELGDLVTRLKRAG--  
 GHXK011403 INLHGVAD-----NDNDAQLADFI EGTFLEQVDAIKDLADKITNLKRVGA-  
 GHXK011411 LRLHAIAD-----AANDAQMTDFIEGNFLNEQVDAIKHLSDMITNLKRVG--  
 GFCI010964 LDLHAVVG-----KRNDPHLADYLEGNFLNEQVDSIKELSDLITKMKRAG--  
 GHWV011161 KHMIDICSQG-----GSDDPHAADWLTSTWLEEQLTGQRHLAGLINTLETFSR-  
 GHWV011130 LDMHKVVG-----DRGDAHTCDFLESEFLGEQVEAAKELSDLITKMKRAG--  
 TRINITY\_DN KLMIDVCSET-----GMDDPHAADWLT SNWLEEQLTGQRHLAGLINS LN NF KH-  
 TRINITY\_DN LEVHKSAG-----AHNDGQLSDFLESNYLEEQVEAIKEIGDLITQMKNVG--  
 TRINITY\_DN LDMHKTVG-----DKGDAHLCDYLESEYLTEQVDSIKEIGDLITKIKRAG--  
 GKAP010174 KNMIDLCSQG-----GEDDPHAADWVTGTWLEEQLHGQRHLAGLINTLEMFSR-  
 GINW011006 ASLHRAALCLTPSAGGIADAGCAIDADLAHK-SQDAIEDYVERVHDLASKANQLSNMFTA  
 GINW012482 IEAYQASKD-----GDSYDPGVKHYLEESLIEPKTETIRELAGKLNILSKMAKV  
 GINW010990 LDLHTLSD-----SHGDYQFSDFIEANYLTEQTEAIKELSDKITNLKRVG--  
 GINW012479 LDLHNSAS-----CKKDPQLTKFLEDEFLEEQIKSMKKLGDMITKLKRAGT-  
 GINW012344 LDLHAVGA-----SKNDPHLT KMIEDNFLDEQVESMKKIGDMITRLKRAGT-  
 GJGX010431 KNMIDLCSQG-----GEDDPHAADWLTGTWLEEQLNGQRHLAGLINTLESFSL-  
 GJGX011542 LAMHKSAD-----NGGDAQFTDFIEGNFLFEEQVEAIKEIGDLITKMKRAG--  
 GJGX011121 LALHTAAG-----EKGDAHLQDFLESNYLDEQVEGIKEIGAFITKIKRAG--  
 GJGX011464 KNMLDLCSQG-----GEDDPHAADWLTGTWLEEQLNCQRHLAGLINTLEAFSR-  
 GCIT010248 LTLHECAG-----KHGDAHLADFLESNYLGEQVDAAKELADLITRMKRAG--  
 HAHV011241 LTLHECAG-----KHGDAHLADFLESNYLGEQVDAAKELADLVTRMKRAG--

NP\_524873- -TNGELGEFLFDKTL-----  
NP\_524802- -PDPSLSVYLFDEYLQKQ-----  
NP\_572854- ---NQVGEFLFDKYMGSgmHPAK----  
BT121711-F -DHEALGDWMFSESLE-----  
BT121232-F DKTKYMGFHLFDKSM-----  
MK887318-F ---PGVGIHLIDEELKRSSTGHSPSNY  
BT077723-F ---PGVGMHLIDQELLKE-----  
BT121164-F ---PGVGMHLIDQELLKKIT-----  
P02792-FTL -PEAGLGEYLFERLTlkHD-----  
P02794-FTH -PESGLAEYLFdkHTLGSDNES----  
GKAA010092 -DHQDLGEWMFDKEL-----  
GKAB010168 -DHKELGEWLFDKEL-----  
HAGX010164 ---DGLGVYMFdKNLS-----  
GJIZ011008 ---DGLGLHIMDKKEIGS-----  
GAXK011425 ---DGLGLHIMDKKELEG-----  
GAXK011686 ---DGLGLHIIDKELLG-----  
GAXK011701 ---DGLGLHIMDKKEIGS-----  
GAXK011690 ANSNAMALHLFDNTLA-----  
GBXT010251 ---DGLGLHIMDKKEIGS-----  
GJFL010131 ---DGLGVIYIDNELKKRFGDKASE--  
GJFL010098 ---DGLGLHIMDRELEG-----  
GJFL010061 ---DGLGVIYIDNELKTIYGKE-----  
GJFL010035 ANSNAMALHLFDNTL-----  
GJRL010689 -GHEELAEWMFDQEL-----  
GJRL010253 ---DGLGLHIMDKKEIGS-----  
GJQX012439 ---DGLGLHIMDKKEIGS-----  
GJQY012322 ---DGLGVIYIDNELKNIYGAE-----  
GJQY010547 ---DGLGVIYIDNELKTIYGKE-----  
GJQY010045 ---DGLGVIYIDNELKKRFGGEDTE--  
GJQY012928 ---DGLGLHIMDKKEIGS-----  
GIVX010931 ---DGLGVYIFDKDLKN-----  
GIVX012281 ---DGLGLHIMDKKEIGS-----  
GKAD010080 -DHGELGEWMFDKEL-----  
GKAD010013 ---DGLGLHIMDKKEIGS-----  
GKAD010082 ---PGLGEYTYDKENLGED-----  
GJRE012107 ---DGLGLHIMDKKEIGS-----  
GJRE010895 ---DGLGLHIMDKKEIGS-----  
GFUA010006 -DHDELAEWMFDKEI-----  
GARW010443 -EHPALADWMFSQQLLKA-----  
GARW010112 -----  
GARW010174 ---DGLGVHIIDKELSS-----  
GCIW010237 -DHVELGEWMFDQQLLGH-----  
GFWO011986 -DHNELGEWMFAKEI-----  
GFUD010187 ---DGLGLHIMDKKEIGS-----  
GFUD010193 ---DGLGLHIIDKELLG-----  
GFUD010218 ---DGLGLHIMDRELES-----  
GFUD010230 -GHEELAEWMFDQEL-----  
GFUD010333 ---DGLGVIYIDNELKEKYGKE-----  
GFUD010085 ---DGLGLHIMDKKEIGS-----  
GJRU010328 ---AGLGLHIMDKKEIGS-----  
GJRH010278 ---DGLGLHIMD-----  
GCJT010110 -SHEHLADWMFSNQLLNE-----  
GHXK010671 -NHENLADWMFSNQLLQQA-----  
GHXK012857 ---DGLGVHIIDKEMD-----  
GHXK011403 ---EGLGLYLFDK-----  
GHXK011411 ---DGLGVYLFDKDIKID-----  
GFCI010964 ---DGLGLHLIDKDMA-----  
GHWV011161 -DHQELAEWMFdQHLAA-----  
GHWV011130 ---TGLGEHIIDKELEA-----  
TRINITY\_DN -GHEELAEWMFDQNL-----  
TRINITY\_DN ---EGLGLHIIDKELQG-----  
TRINITY\_DN ---EGLGLHIMDKEMES-----  
GKAP010174 -DHEEMGEWMFDKEL-----  
GINW011006 -TEYSLAEHMFdKSLM-----  
GINW012482 DNTRNMALHLFDKSM-----  
GINW010990 ---TGLGEYMYDKELQS-----  
GINW012479 ---SGLGEFIFDKEL-----  
GINW012344 ---SGLGEYTFDKEFQ-----  
GJGX010431 -DHGELGEWMFDQEL-----  
GJGX011542 ---DGLGLHIIDKELLG-----  
GJGX011121 ---AGLGTHILDKELAA-----  
GJGX011464 -DHDEMA-----  
GCIT010248 ---EGVGLIMIDKEMKKKAE-----  
HAHV011241 ---EGVGLIMIDKEMKEKAE-----

**Figure S1. Ferritin sequence alignment.** Ferritin sequences identified for copepods in this study were aligned with known sequences from *D. melanogaster* (NP\_524873, NP\_524802, NP\_572854), *L. salmonis* (LsFer1-4) (BT121711, BT121232, MK887318, BT077723, BT121164) and homologs from *H. Sapiens* (P02794, P02792). Copepod sequences are in alphabetical order as in Table 1. In green, ferritin known as Light chain (FTL). Amino acids that make up the ferroxidase center of the heavy chain in human are bolded in red. Highlighted in yellow the amino acids which were not conserved.
